# Supplementary material
Source: PubMed Central journal article supplement (PMC7819484)

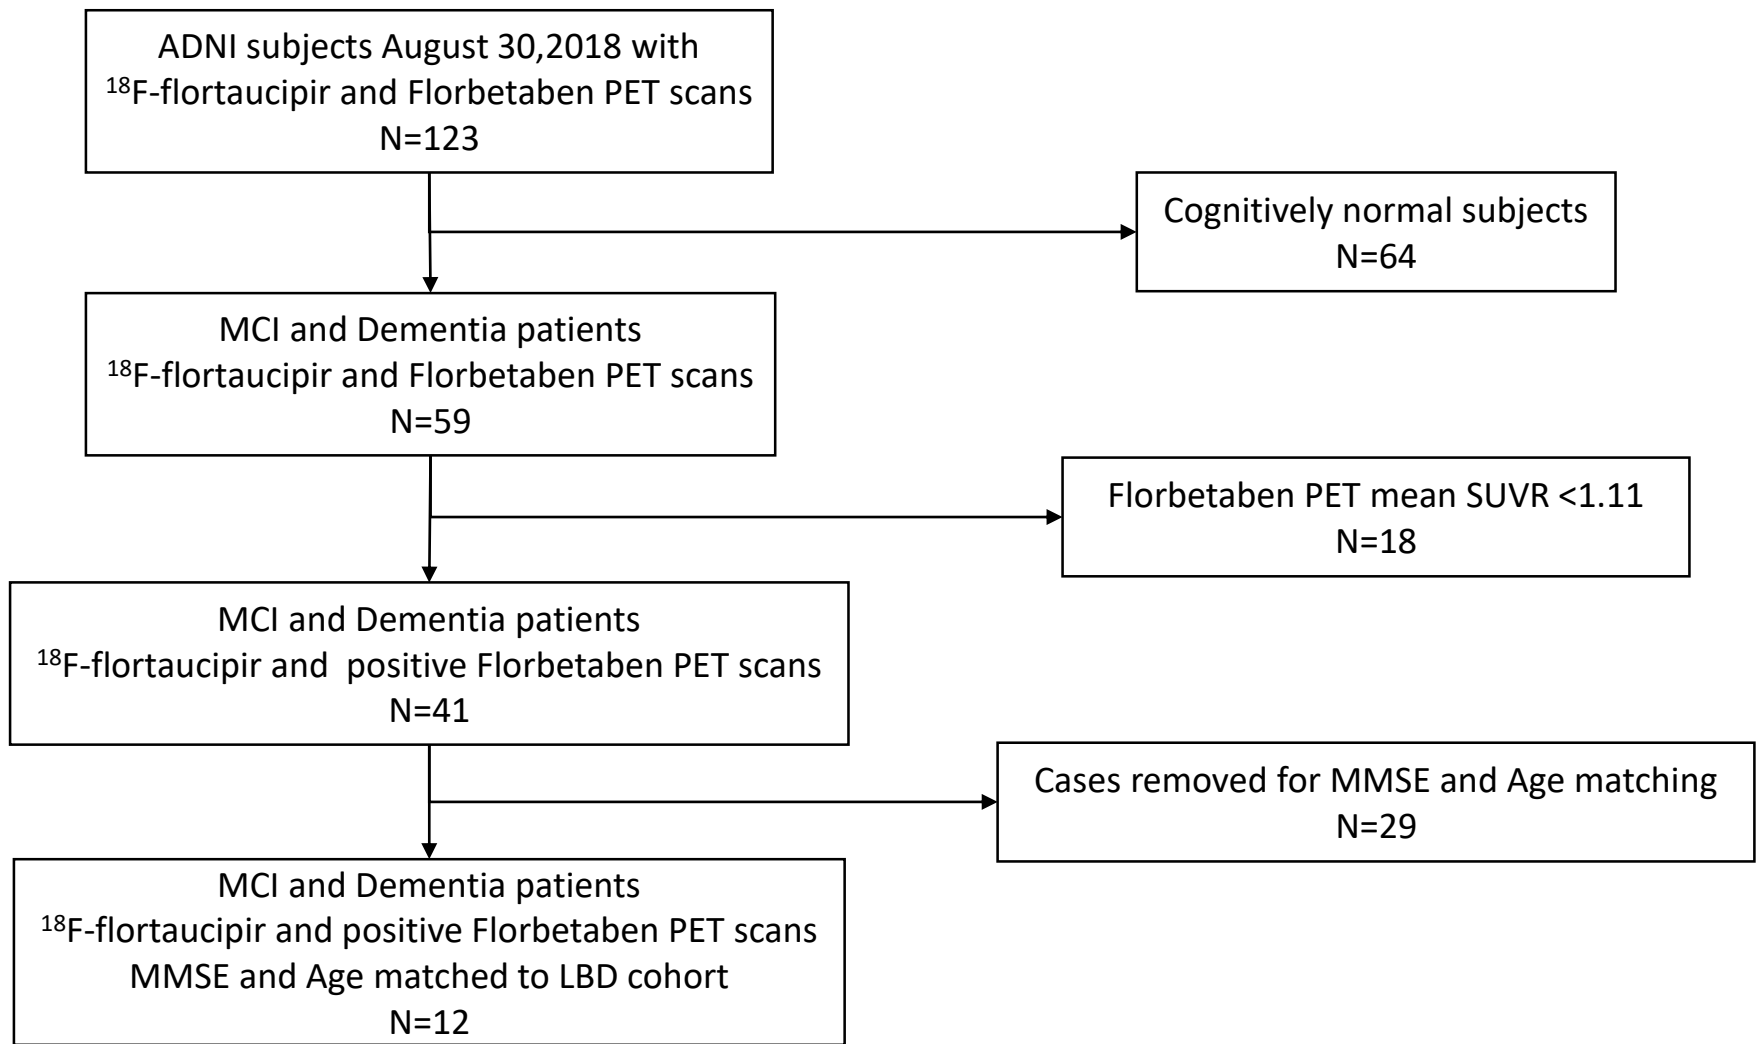

Supplement: NIHMS1623643-supplement-2.pdf [file NIHMS1623643-supplement-2.pdf]
